# Supplementary material for: Heritable priming by Trichoderma: A sustainable approach for wheat protection against Bipolaris sorokiniana
Source: Frontiers journal article supplement (doi:10.3389/fpls.2022.1050765), 2022-12-16
Supplement: Data_Sheet_1.pdf [file Data_Sheet_1.pdf]

## Supplementary figures

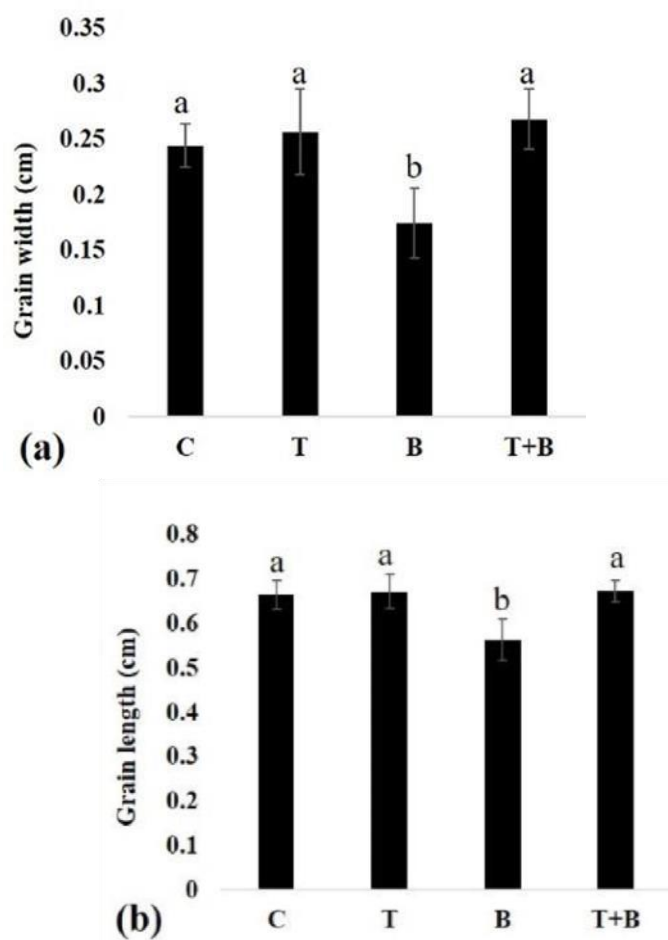

**Figure 1-** Effect of *Trichoderma*-priming on the yield of the wheat in G0 after challenging with *Bipolaris sorokiniana* HD 3069. (a) Grain width. n = 25, (b) Grain length. n = 25.

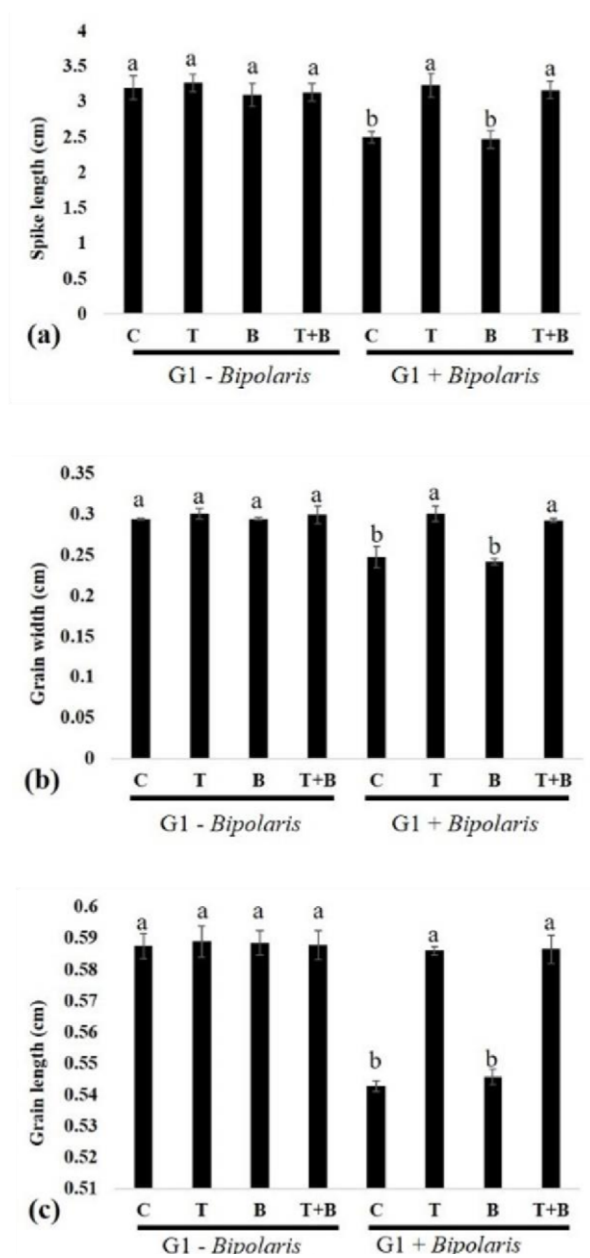

**Figure 2-** Effect of IGIP on the yield of the wheat in G1 after challenging with *Bipolaris sorokiniana* HD 3069. **(a)** Spike length, n =20, **(b)** Grain width. n = 25, **(c)** Grain length. n = 25.
